# Supplementary material for: Self-reducing molecular ink for printed electronics and lithium-ion battery cathodes as conductive binder
Source: Royal Society of Chemistry journal article supplement (doi:10.1039/d3tc03636g), 2024-01-01
Supplement: d3tc03636g1.pdf [file d3tc03636g1.pdf]

## SUPPORTING INFORMATION

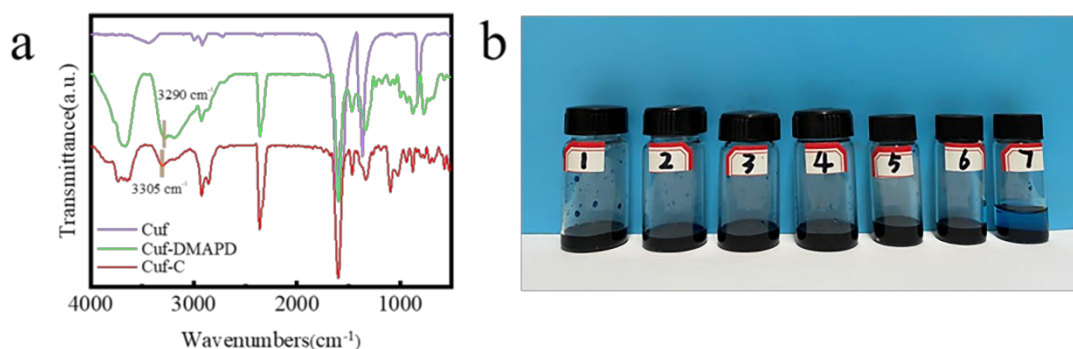

**Figure S1.** (a) Fourier infrared spectrum analysis of Cuf, Cuf-DMAPD and Cuf-C. (b) Solubility test of Cuf-C: (1) ethylene glycol, (2) isopropyl alcohol, (3) 1, 3-propylene glycol, (4) 1, 4-butanediol, (5) deionized water, (6) trichloromethane and (7) toluene.

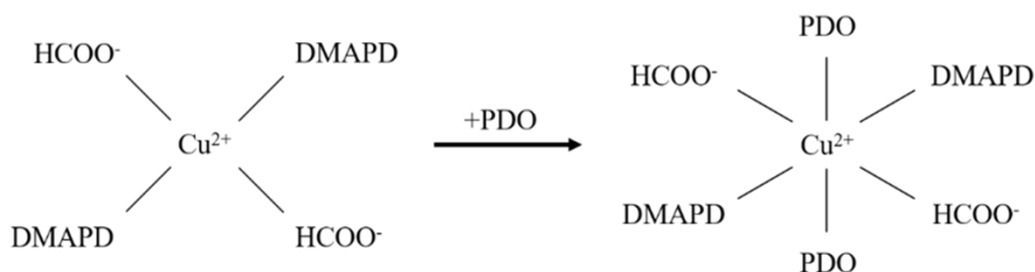

**Figure S2.** Schematic diagram of the coordination structure after adding PDO

The wide absorption band caused by the stretching vibration of O-H in DMAPD after the coordination of Cuf with DMAPD was shown at 3290 cm<sup>-1</sup>, which proved the coordination of Cu<sup>2+</sup> with DMAPD. After the addition of PDO, the absorption band shifted to 3305 cm<sup>-1</sup>, showing the change of coordination structure after the addition of PDO. The 1336 cm<sup>-1</sup> is the stretching vibration of C-N in DMAPD. The carboxyl group has no absorption peak at about 1710 cm<sup>-1</sup>, but there is an asymmetric stretching vibration of the carboxyl group at 1595 cm<sup>-1</sup>, indicating that there is a

coordination structure between the carboxyl group and the copper. With the addition of DMAPD and PDO, the absorption peak of Cuf at  $1606\text{ cm}^{-1}$  moves to a lower wavenumber, indicating the difference in the coordination structure between Cuf and the latter two carboxyl groups and copper.

**Table S1** The formulation of Cuf-C slurry and PVDF slurry

| Reagent     | Cuf-C slurry<br>/g | PVDF slurry<br>/g |
|-------------|--------------------|-------------------|
| Cuf         | 0.139              | -                 |
| DMAPD       | 0.237              | -                 |
| PDO         | 0.124              | -                 |
| PVDF powder | -                  | 0.5               |
| NMP         | 10                 | 10                |
| Super-P     | 0.5                | 0.5               |
| NCM811      | 4                  | 4                 |

### **Finite element simulation on polarization distribution of the composites**

A single two-dimensional idealized model was established to simulate the distribution of polarization. The geometric models of Cuf-C/NCM811 cathode and PVDF/NCM811 cathode were established for simulation. The NCM811 particles located in the center were surrounded and tangent by Super-P particles. The peripheral Super-P particles kept point contact with each other. The geometric model of NCM811 was set as a circle with a radius of  $6.35\text{ }\mu\text{m}$ , and the relative dielectric constant was 190. The geometric model of Super-P was set as a circle with a radius of  $200\text{ nm}$ , and the conductivity was  $1 \times 10^5\text{ S/m}$ . The adhesive was set as a continuous square area with a length and width of  $16\text{ }\mu\text{m}$ . The actual measured conductivity of the copper-based adhesive was  $1.75 \times 10^4\text{ S/m}$ . The relative dielectric constant of PVDF adhesive was 10. The remaining parameters referred to the material library data. A voltage of  $2.5\text{ V}$  was applied in the

left and right directions of the composite model.

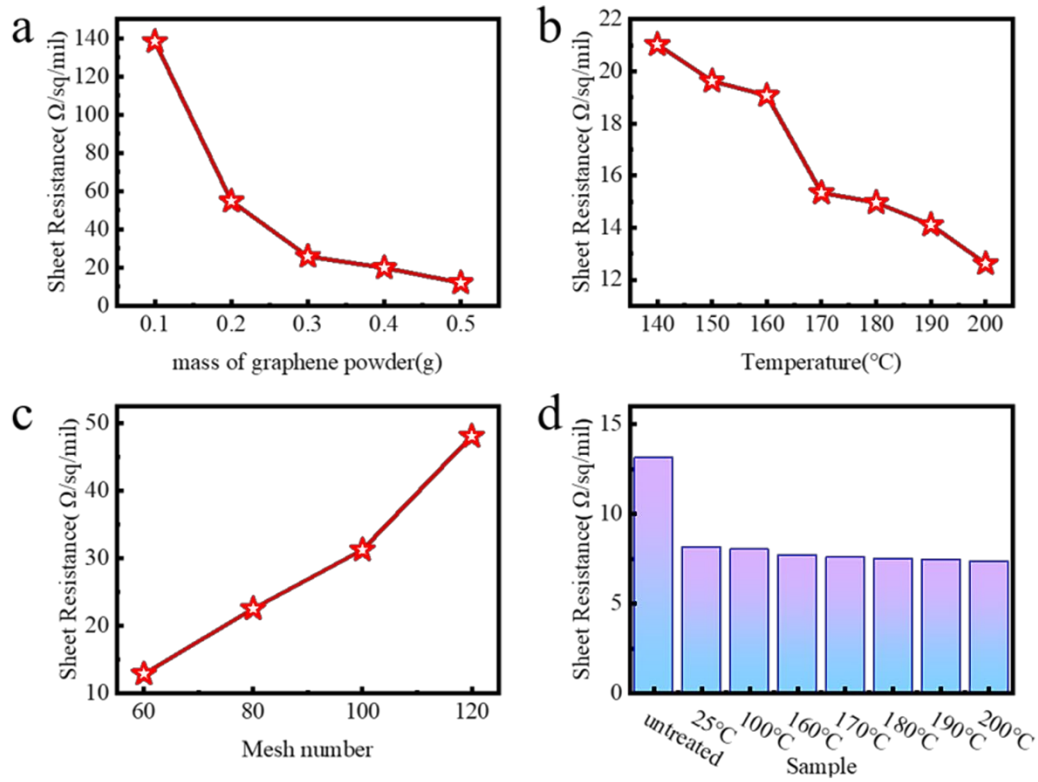

**Figure S3.** The effects of different (a) graphene powder addition amounts, (b) heat treatment temperatures, (c) screen mesh number, (d) post-treatment operations on the ink resistance .

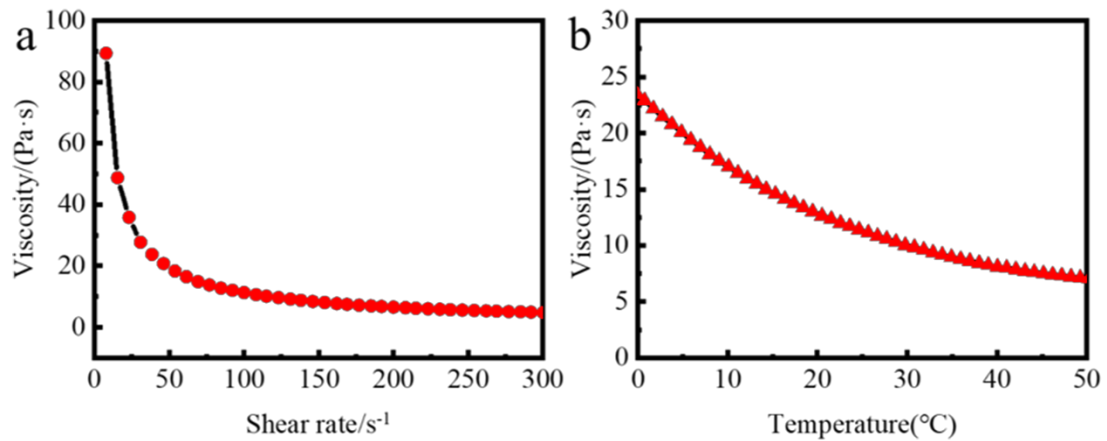

**Figure S4.** (a) Viscosity -shear rate curve, (b) Viscosity - temperature curve

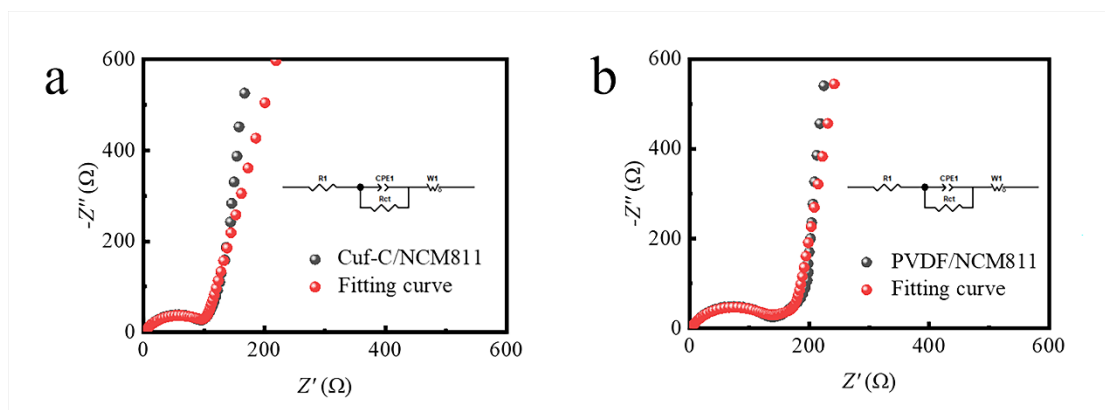

**Figure S5.** Equivalent circuit fitting data of (a) Cuf-C/NCM811 cell and (b) PVDF/NCM811 cell.

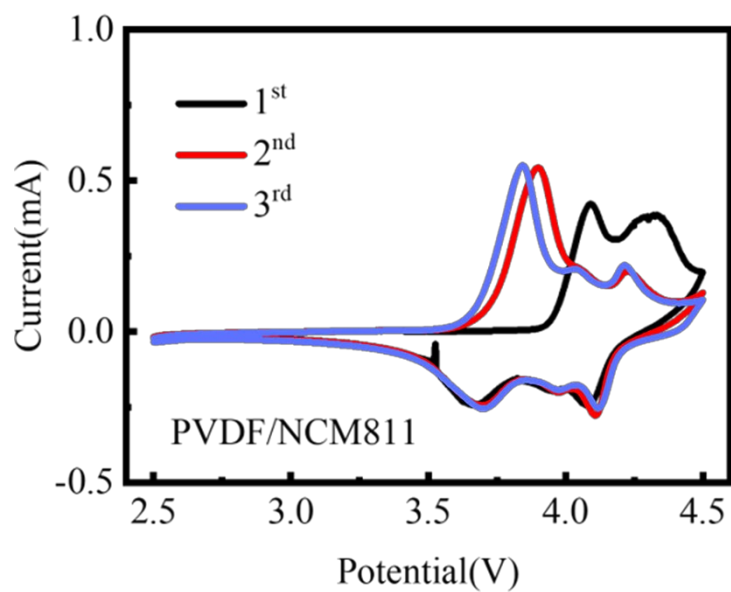

**Figure S6.** The consecutive CV curves of the first three cycles at a scan rate of  $0.1 \text{ mV s}^{-1}$  in the voltage range of 2.5-4.5 V for PVDF/NCM811 cell.

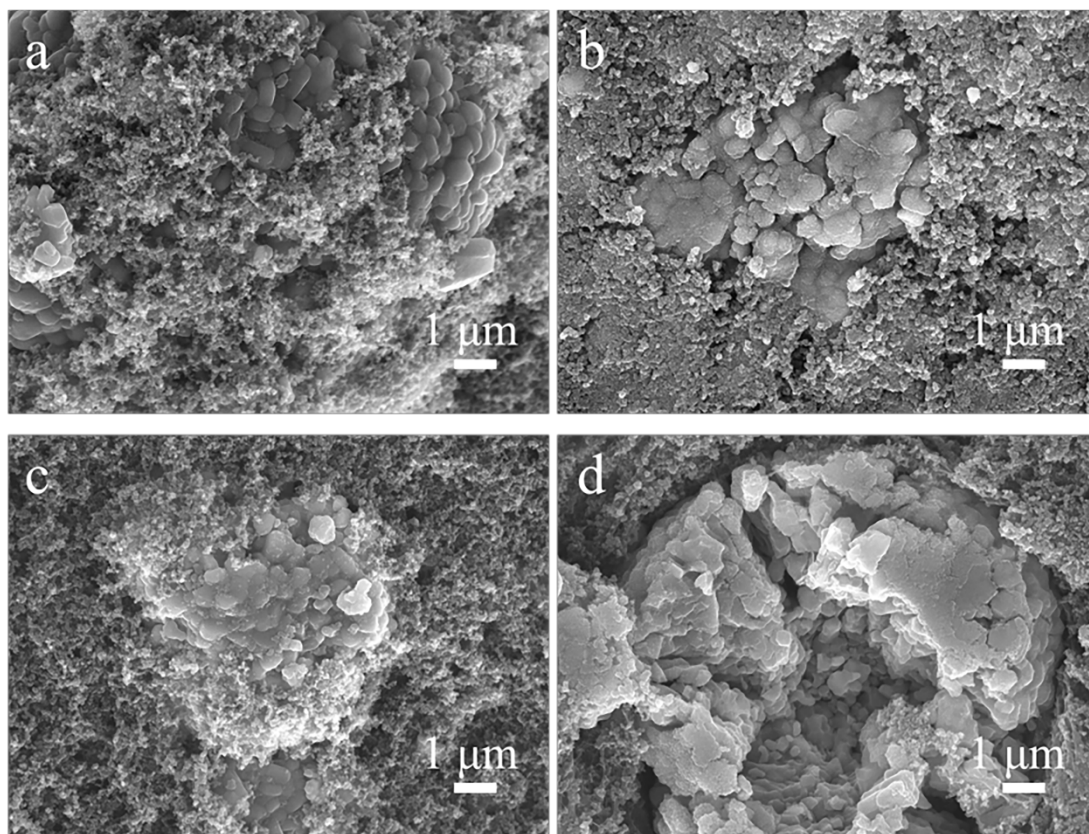

**Figure S7.** SEM images of Cuf-C/NCM811 cell (a) before and (b) after 100 charge-discharge cycles in the voltage range of 2.5-4.3 V at 1C. SEM images of PVDF/NCM811 cell (c) before and (d) after 100 charge-discharge cycles in the voltage range of 2.5-4.3 V at 1C.

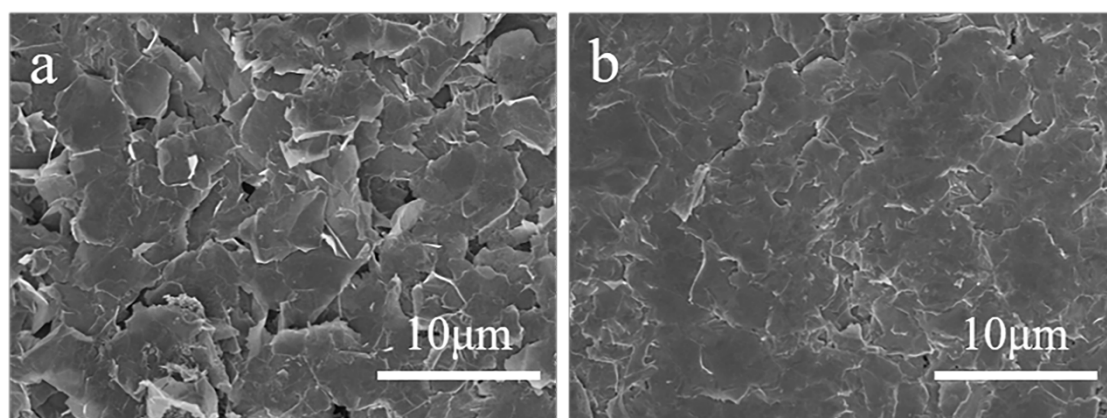

**Figure S8.** SEM images (a) before and (b) after hot pressing of Cuf-C/G ink

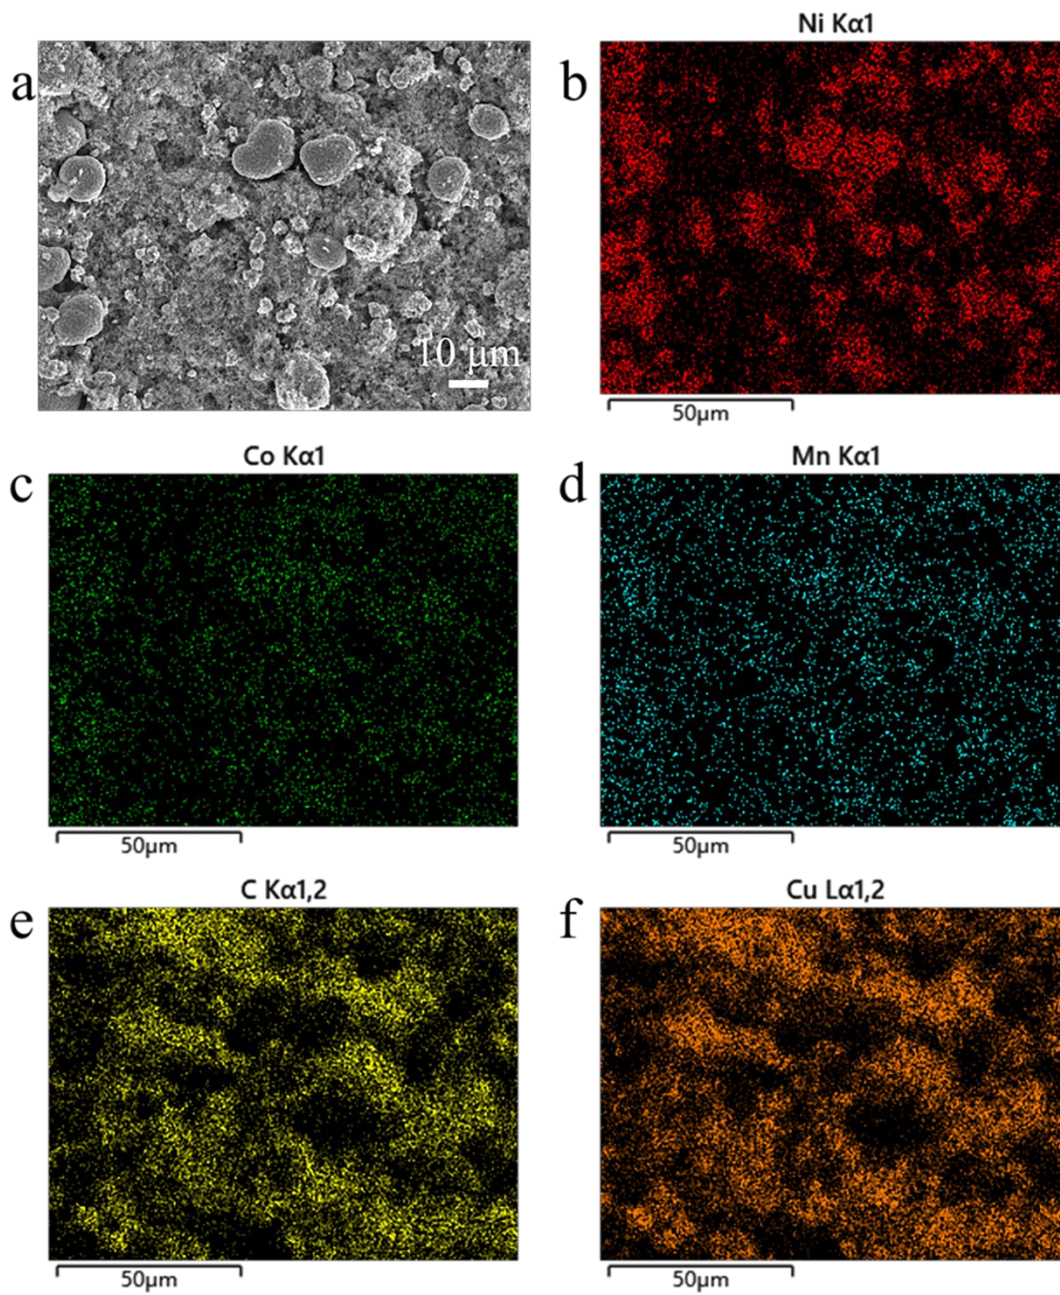

**Figure S9.** (a) SEM image and (b-f) EDS images of Cuf-C/NCM811. The Cuf-C/NCM811 cathode has not been rolled.

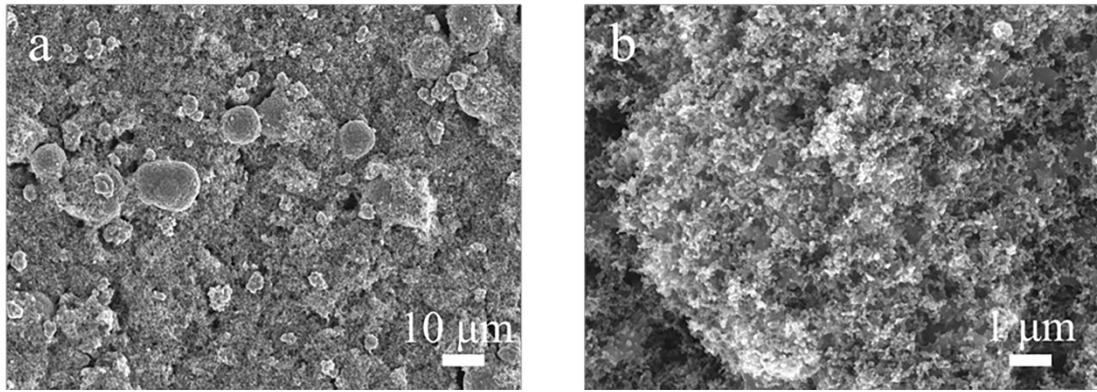

**Figure S10.** SEM images of Cuf-C/NCM811 cathode after soaking in a commercial electrolyte for 24 h.

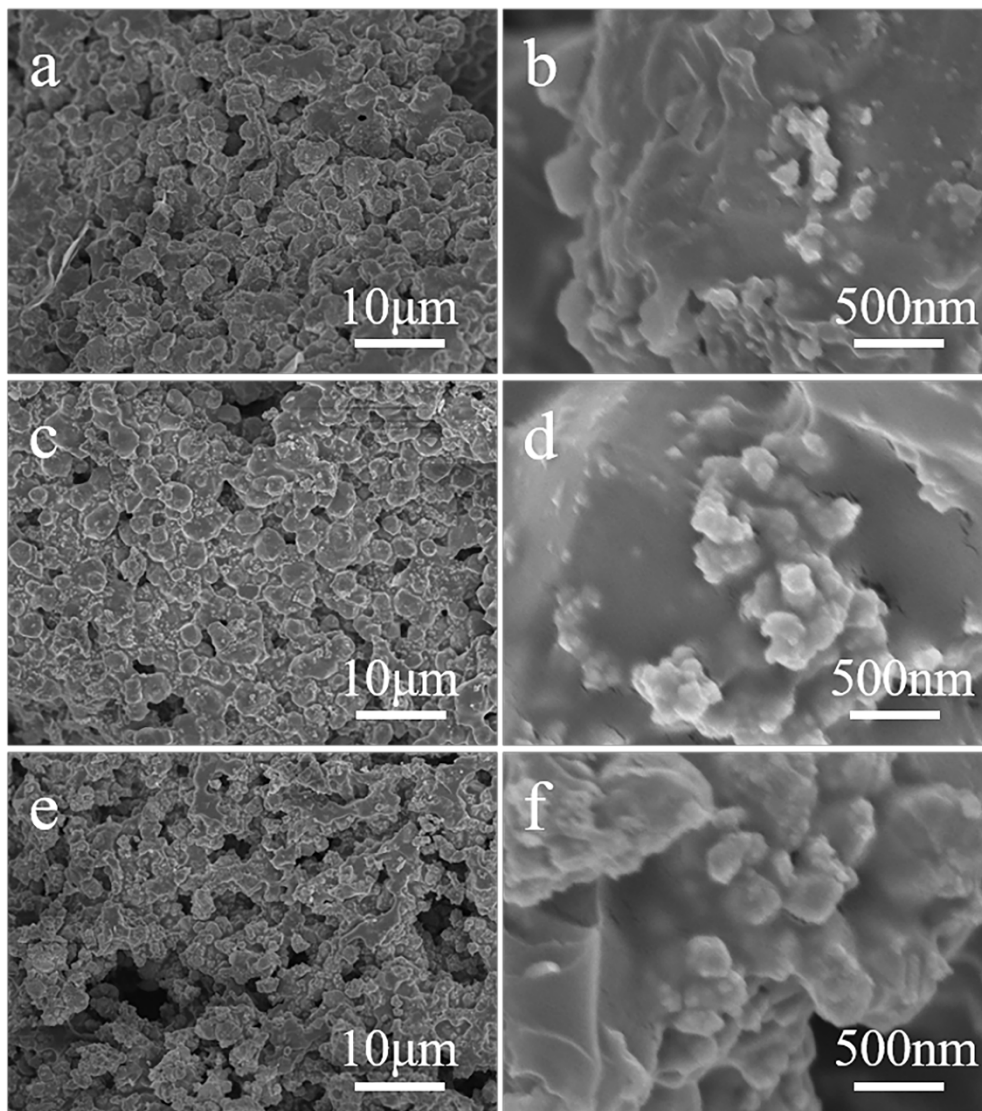

**Figure S11.** SEM images of Cuf-C pyrolysis products  
(a-b) 140°C/30 min; (c-d) 160°C/30 min; (e-f) 180°C/30 min

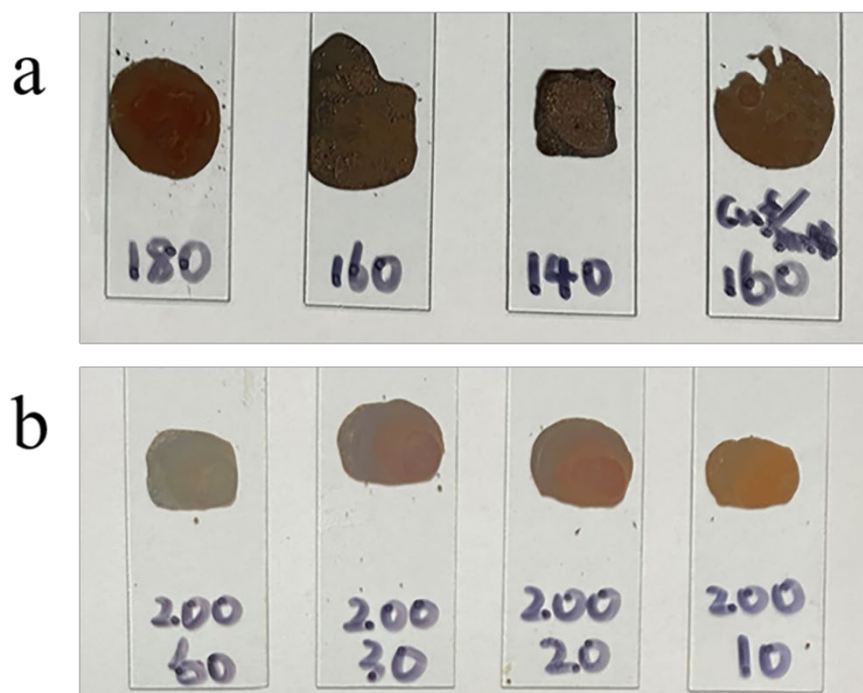

**Figure S12.** Sintered patterns

(a) Cuf-C at 140°C, 160°C, 180°C for 30 min and Cuf-DMAPD at 160°C for 30 min

(b) Cuf-C at 200°C for 10 min, 20 min, 30 min and 60 min

**Table S2.** Ink formulation

|          | Cuf<br>/g | DMAPD<br>/g | PDO<br>/g | Graphene<br>/g | Super-P<br>/g | Copper<br>powder/g |
|----------|-----------|-------------|-----------|----------------|---------------|--------------------|
| Cuf-C/G  | 1.92      | 3.28        | 1.71      | 0.5            | -             | -                  |
| G        | -         | 3.28        | 1.71      | 0.5            | -             | -                  |
| Cuf-C/SP | 1.92      | 3.28        | 1.71      | -              | 0.5           | -                  |
| SP       | -         | 3.28        | 1.71      | -              | 0.5           | -                  |
| Cuf-C/CP | 1.92      | 3.28        | 1.71      | -              | -             | 0.5                |
| CP       | -         | 3.28        | 1.71      | -              | -             | 0.5                |



**Table S3.** Preparation process of inks

|             | Heat treatment | Post-processing       |
|-------------|----------------|-----------------------|
| Cuf-C/G     | 200°C, 10 min  | -                     |
| G           | 200°C, 10 min  | -                     |
| Cuf-C/G(P)  | 200°C, 10 min  | 200°C, 10 MPa, 10 min |
| G(P)        | 200°C, 10 min  | 200°C, 10 MPa, 10 min |
| Cuf-C/SP    | 200°C, 10 min  | -                     |
| SP          | 200°C, 10 min  | -                     |
| Cuf-C/SP(P) | 200°C, 10 min  | 200°C, 10 MPa, 10 min |
| SP(P)       | 200°C, 10 min  | 200°C, 10 MPa, 10 min |
| Cuf-C/CP    | 200°C, 10 min  | -                     |
| CP          | 200°C, 10 min  | -                     |
| Cuf-C/CP(P) | 200°C, 10 min  | 200°C, 10 MPa, 10 min |
| CP(P)       | 200°C, 10 min  | 200°C, 10 MPa, 10 min |

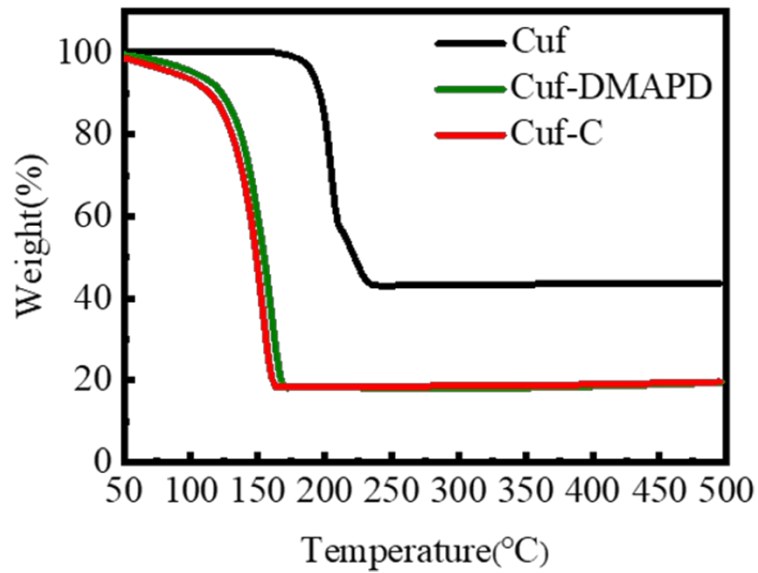**Figure S13.** TG curves of Cuf, Cuf-DMAPD and Cuf-C under an air environment

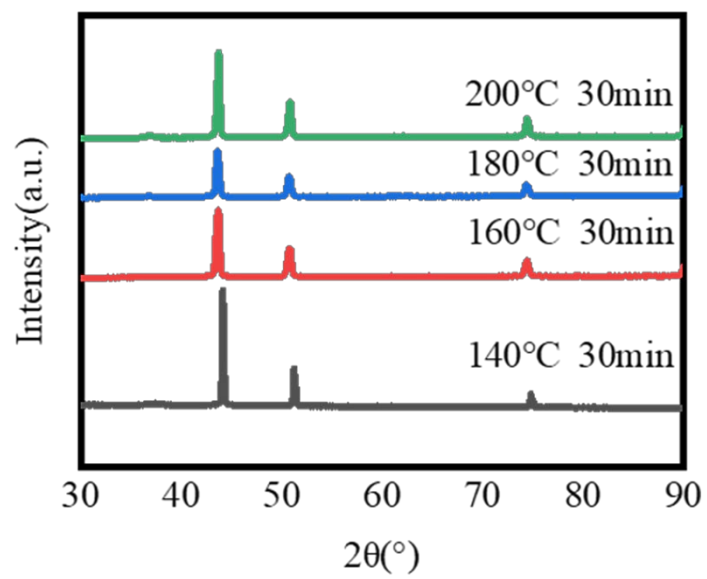

**Figure S14.** XRD pattern of Cuf-C annealed at different temperatures for 30 min
